# Supplementary material for: Optimization of Aeolus Optical Properties Products by Maximum-Likelihood Estimation
Source: Copernicus journal article supplement (doi:10.5194/amt-2021-212), 2021-08-06

# MLE without constraints

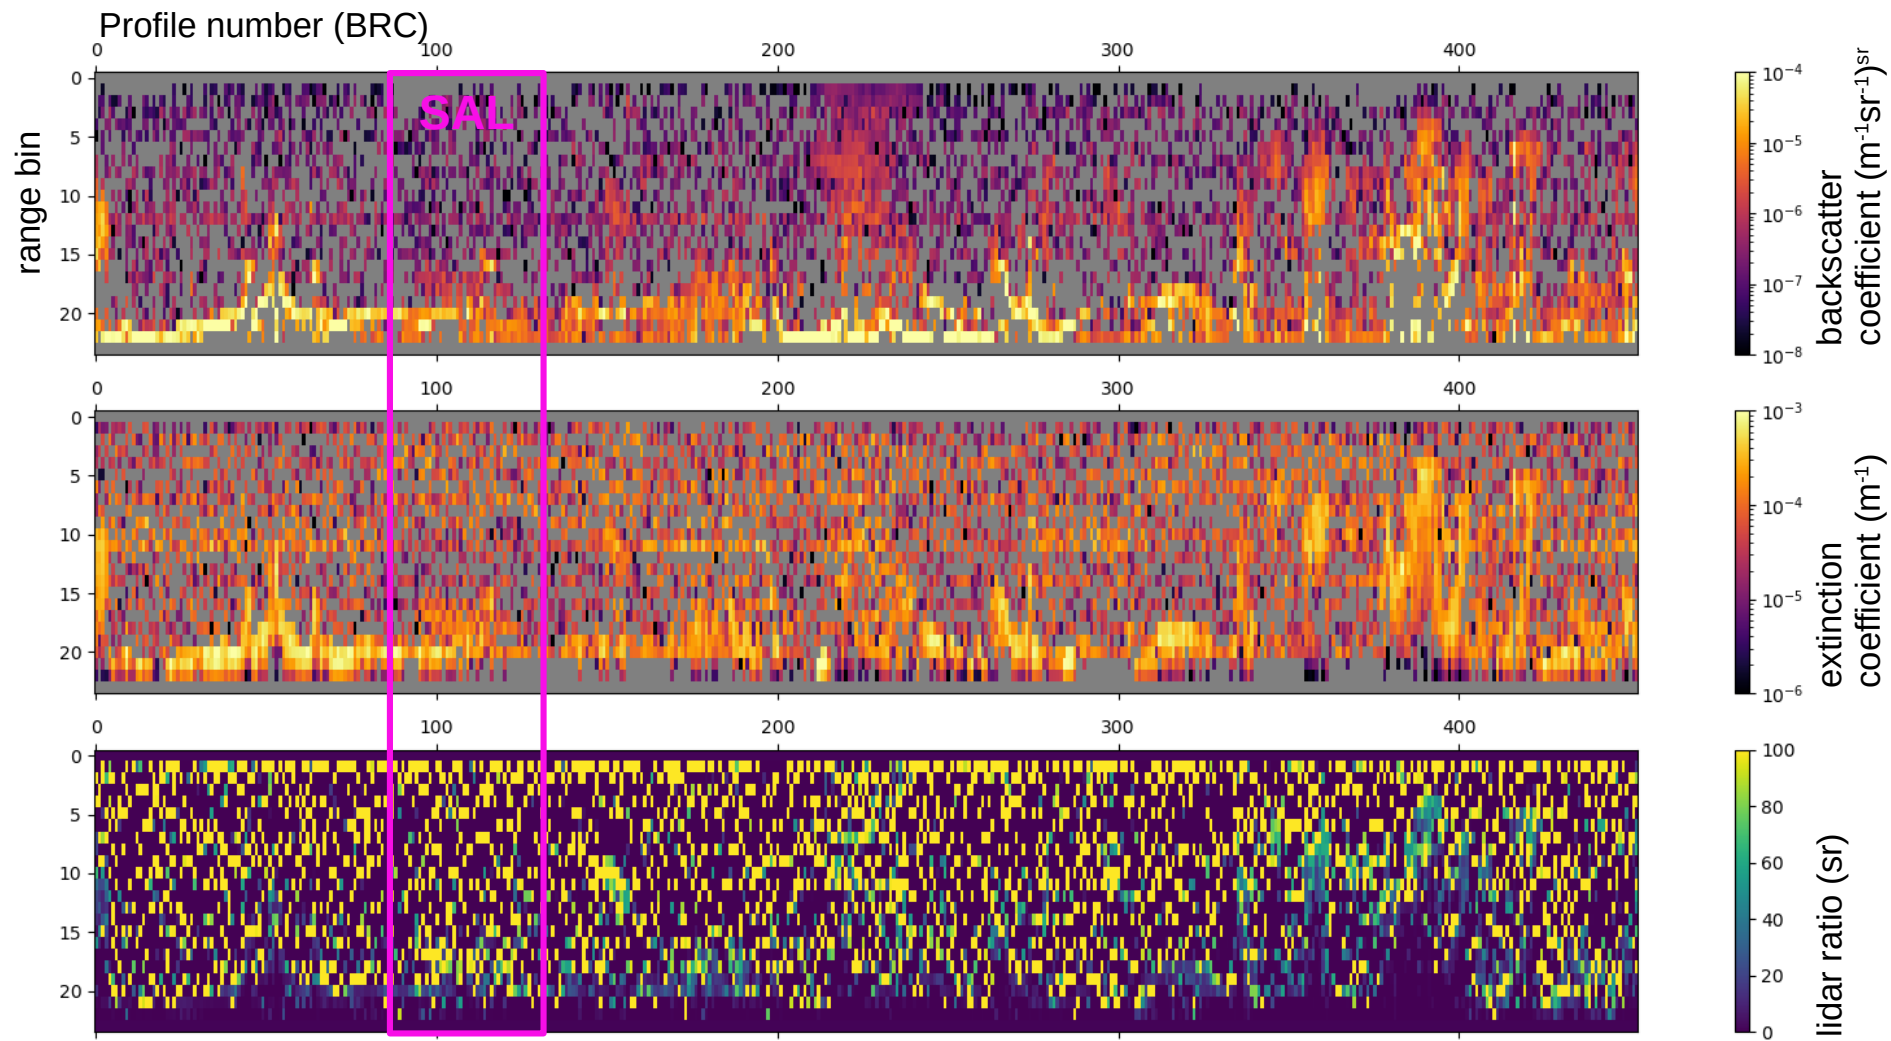

# MLE with constraints

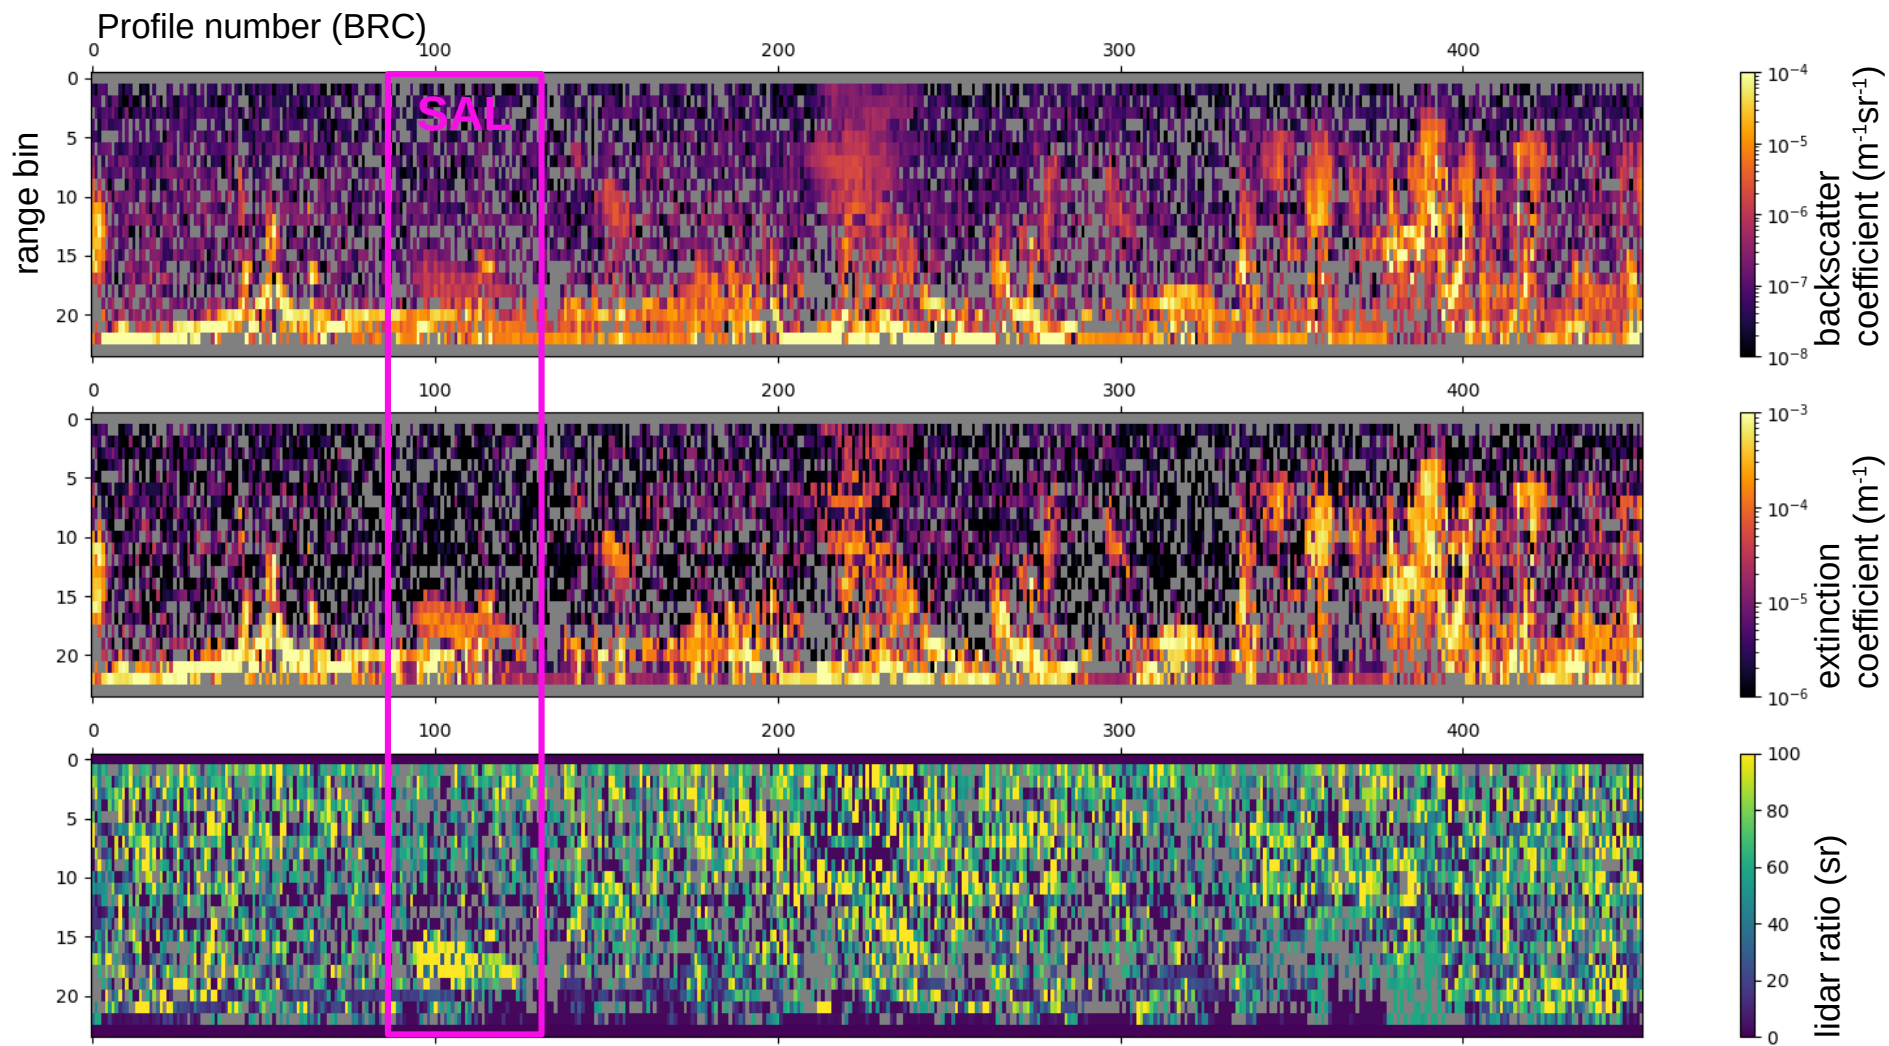

Supplement: Supplementary file [file amt-2021-212-AC3-supplement.zip]
